# Supplementary material for: Time-dependent DFT and experimental study on visible light photocatalysis by metal oxides of Ti, V and Zn after complexing with a conjugated polymer
Source: Royal Society of Chemistry journal article supplement (doi:10.1039/c8nj04729d), 2018-12-11
Supplement: c8nj04729d1.pdf [file c8nj04729d1.pdf]

## Time- dependent DFT and experimental study on visible light photocatalysis by metal oxides of Ti, V and Zn after complexing with conjugated polymer

Navjot Kaur<sup>1</sup>, Komal<sup>1</sup>, Shuchi Gupta<sup>2</sup>, Sonal Singhal<sup>1\*</sup> and Neetu Goel<sup>1\*</sup>

<sup>1</sup>Department of Chemistry & Centre of Advanced Studies in Chemistry, Panjab University,  
Chandigarh-160014, India

<sup>2</sup> University Institutes of Engineering and Technology, Panjab University, Chandigarh, 160014,  
India

### Supporting Information

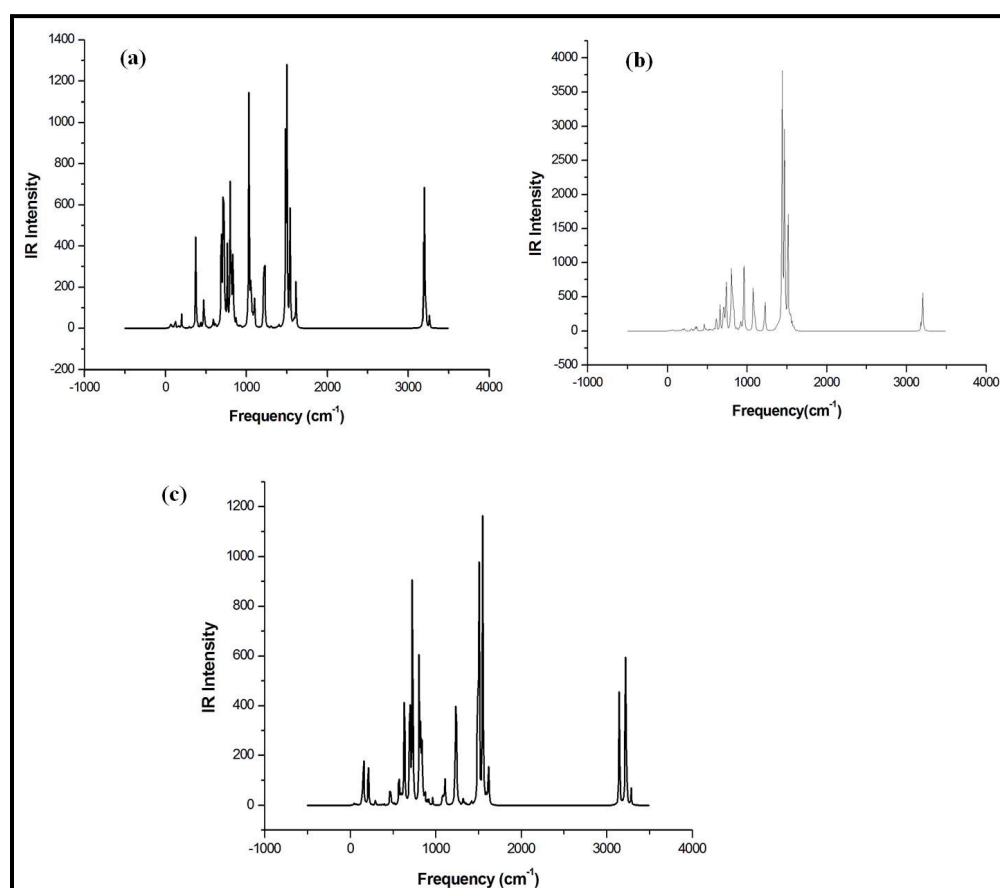

Figure S1. DFT calculated IR spectrum of (a) PTh-(TiO<sub>2</sub>)<sub>2</sub> (b) PTh-V<sub>2</sub>O<sub>5</sub> (c) PTh-(ZnO)<sub>3</sub> complexes.

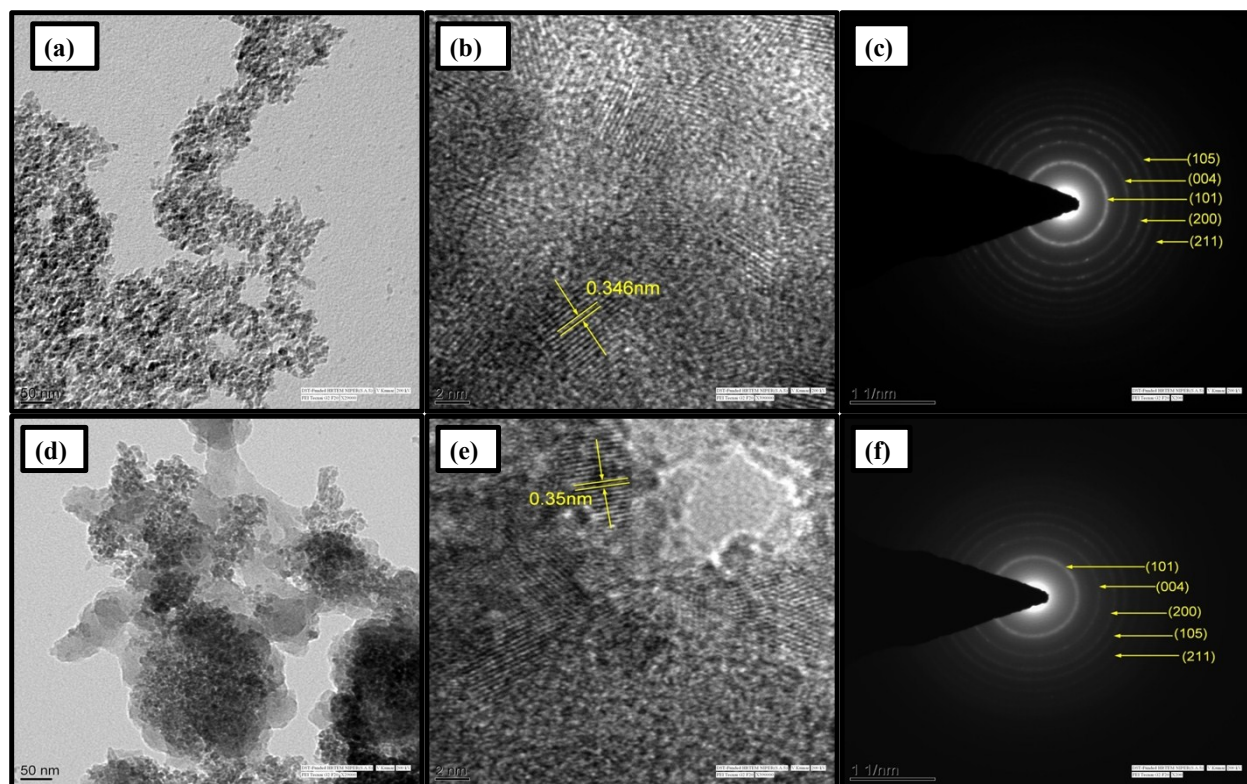

**Figure S2. Low resolution TEM images (a and d), High resolution TEM images (b and e) and SAED pattern (c and f) for TiO<sub>2</sub> nanostructure and PTh-TiO<sub>2</sub> complex, respectively.**

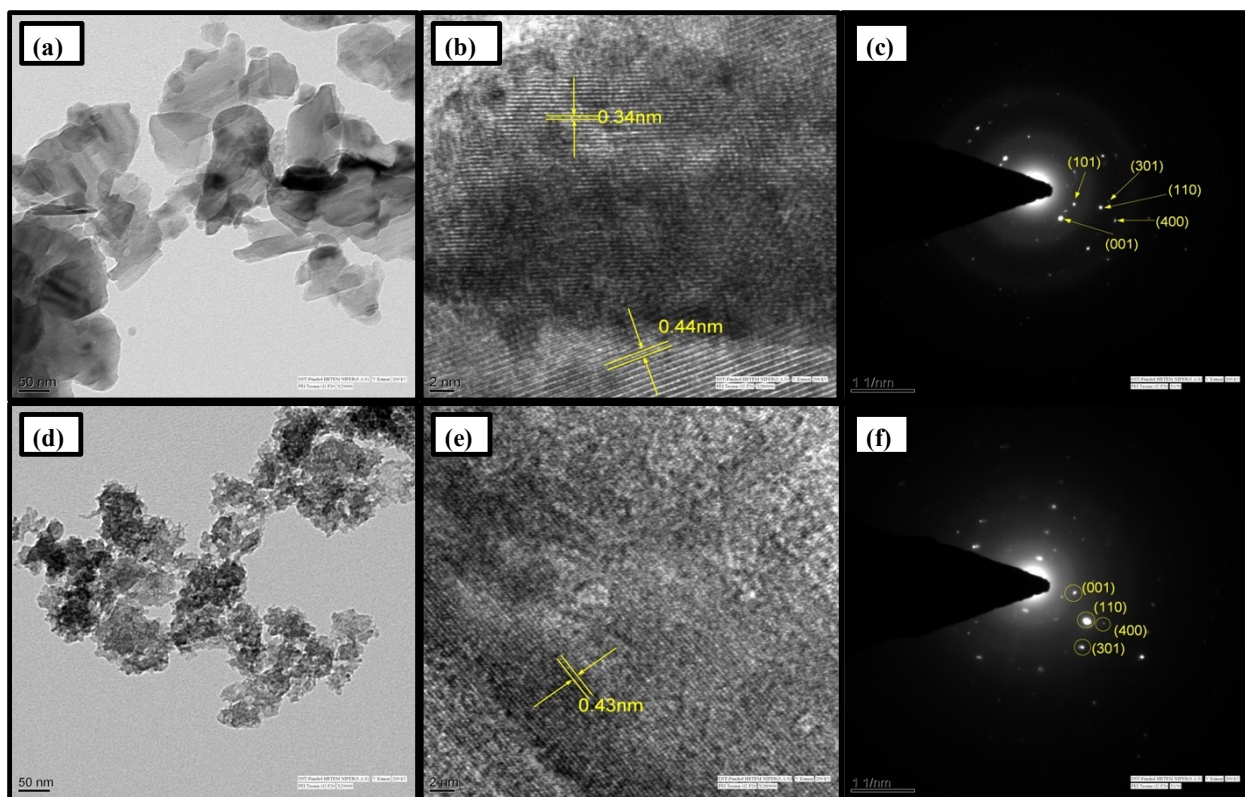

**Figure S3.** Low resolution TEM images (a and d), High resolution TEM images (b and e) and SAED pattern (c and f) for  $V_2O_5$  nanostructure and PTh- $V_2O_5$  complex, respectively.

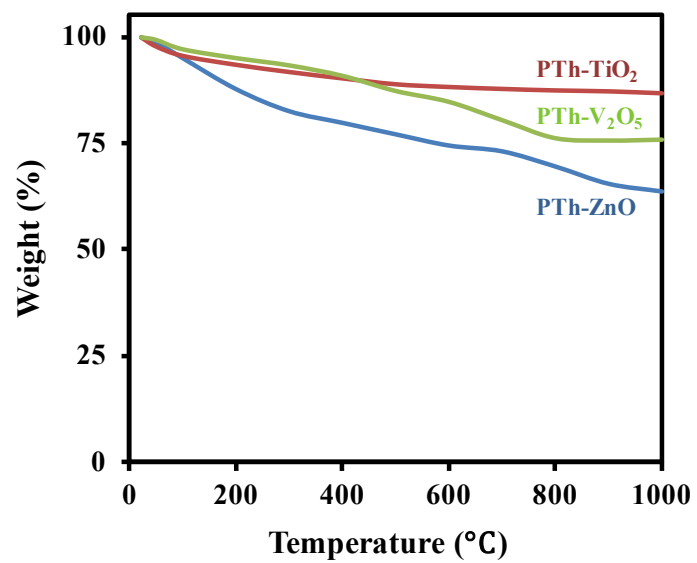

**Figure S4. TGA thermograms of TMO-PTh nanocomposites.**
